# Supplementary material for: Systematic perturbation of retroviral LTRs reveals widespread long-range effects on human gene regulation
Source: eLife. 2018 Aug 2;7:e35989. doi: 10.7554/eLife.35989 (PMC6158008; doi:10.7554/eLife.35989)
Supplement: Supplementary file 1. [file elife-35989-supp1.xlsx]

## Sheet: Figures 5A and 5B
Bins shown in figures
Bin	Number of genes	CRISPRa (Figure 5A) Wilcoxon signed-rank test P-value	CRISPRi (Figure 5B) Wilcoxon signed-rank test P-value
-200	227	0.00929	0.052
-160	270	7.33e-08	0.000206
-120	257	5.37e-07	4.63e-06
-80	299	1.78e-18	6.8e-11
-40	321	5.63e-36	2.24e-23
0	408	4.37e-52	1.31e-47
40	268	7.3e-31	3.64e-22
80	306	3.46e-23	9.15e-14
120	254	3.66e-11	4.11e-06
160	260	4.7e-06	0.0201
200	231	4.73e-06	0.000612
Bins not shown
Bin (kb)	Number of genes	CRISPRa (Figure 5A) Wilcoxon signed-rank test P-value	CRISPRi (Figure 5B) Wilcoxon signed-rank test P-value
-420 to -380	178	0.291	0.002
-380 to -340	203	0.02	0.775
-340 to -300	171	0.762	0.1
-300 to -260	197	0.035	0.801
-260 to -220	219	0.054	0.014
220 to 260	218	0.036	0.028
260 to 300	241	0.005	0.043
300 to 340	197	0.851	0.132
340 to 380	200	0.297	0.456
380 to 420	208	0.499	0.669

## Sheet: Figures 5C and 5D
Bins shown in figures
Bin	Number of genes	Theunissen (Figure 5C) Wilcoxon signed-rank test P-value	Takashima (Figure 5D) Wilcoxon signed-rank test P-value
-200	227	0.587424	0.0128413
-160	270	0.988695	0.126379
-120	257	0.860506	0.0046162
-80	299	0.145068	1.58011e-05
-40	321	1.37092e-12	7.90696e-20
0	408	2.1712e-19	6.38307e-40
40	268	2.0327e-09	6.83307e-18
80	306	0.0195863	0.000113592
120	254	0.531985	9.40791e-07
160	260	0.311827	0.00296867
200	231	0.989129	0.00361116
Bins not shown
Bin (kb)	Number of genes	Theunissen (Figure 5C) Wilcoxon signed-rank test P-value	Takashima (Figure 5D) Wilcoxon signed-rank test P-value
-420 to -380	178	0.0100503	0.208185
-380 to -340	203	0.0344734	0.462157
-340 to -300	171	0.657427	0.985031
-300 to -260	197	0.718108	0.187047
-260 to -220	219	0.514027	0.0467581
220 to 260	218	0.245809	0.167376
260 to 300	241	0.833016	0.108497
300 to 340	197	0.0868283	0.502456
340 to 380	200	0.221745	0.739495
380 to 420	208	0.0294929	0.518026
