# Supplementary material for: Systematic perturbation of retroviral LTRs reveals widespread long-range effects on human gene regulation
Source: eLife. 2018 Aug 2;7:e35989. doi: 10.7554/eLife.35989 (PMC6158008; doi:10.7554/eLife.35989)
Supplement: Supplementary file 2. [file elife-35989-supp2.xlsx]

## Sheet: Antibodies
Antibody	Host species	Clonality	Manufacturer	Catalog number	Lot number	Application/dilution	URL
HERVK env	mouse	Monoclonal	Austral Biologicals	HERM-1811-5	MA170615KB	Western blot (1:1000)	http://www.australbiologicals.com/index.php?what=catalog&id=338
RNA pol II (clone 8WG16)	mouse	Monoclonal	Biolegend	920101		Western blot (1:500)	http://www.biolegend.com/pop_data.php?id=11145
Cas9 (clone 8C1-F10)	mouse	Monoclonal	Active Motif	61757	10216001	ChIP (5 ug)	http://www.activemotif.com/catalog/details/61757/cas9-antibody-mab-clone-8c1-f10
GFP	rabbit	Polyclonal	Abcam	ab290	GR196475-1	ChIP (5 ug)	http://www.abcam.com/gfp-antibody-chip-grade-ab290.html
GFP	rabbit	Polyclonal	Thermo Fisher Scientific (Invitrogen)	A-11122	1828014	ChIP (5 ug)	https://www.thermofisher.com/antibody/product/GFP-Tag-Antibody-Polyclonal/A-11122
H3K27ac	rabbit	Polyclonal	Active Motif	39133		ChIP (5 ug)	http://www.activemotif.com/catalog/details/39133
H3K4me3	rabbit	Polyclonal	Active Motif	39159		ChIP (5 ug)	http://www.activemotif.com/catalog/details/39159
H3K9me3	rabbit	Polyclonal	Abcam	ab8898		ChIP (5 ug)	http://www.abcam.com/histone-h3-tri-methyl-k9-antibody-chip-grade-ab8898.html

## Sheet: RT-qPCR primers
Amplicon	Forward primer	Reverse primer	Application	Notes
HERVK env	GCTGCCCTGCCAAACCTGAG	CCTGAGTGACATCCCGCTTACC	RT-qPCR	from Grow et al., Nature 2015
HERVK gag	AAATAAGACCCAACCGCCAGTAGC	GAATTGCCATGCCTCAGTATCTCC	RT-qPCR	from Grow et al., Nature 2015
HERVK pro	GCCGATGAAAAAGCCCGTAAGG	TTGACACTCAGGATTGGCGTTTTC	RT-qPCR	from Grow et al., Nature 2015
LTR5HS	GGGCAGCAATACTGCTTTGT	CAATAGTGGGGAGAGGGTCA	RT-qPCR	from Grow et al., Nature 2015
Cacna2d2	CCAGATCCTGCAGGTCAAGTA	CGTGTCCTTCAGACTCAAAGC	RT-qPCR
Epha7	CATGGTCTTTGGCTTCATCA	AGCTCTTCATCGCCTTCTTG	RT-qPCR
Alppl2	ACAGCTGCCAGGATCCTAAA	GGCCAGGAAGGTCTCAGG	RT-qPCR
Nfkb2	ACACCGTTGTACAAAGATACGC	GGCCCGGCTCTGTCTAGT	RT-qPCR
Serpinb9	AACACCGCAACCCAGATG	ACTGGAAAGCCCGATGAAT	RT-qPCR
Gdpd1	AAGAAGCAGCGATTCCTCAG	GCTGCCATTGTATTCTCCAAA	RT-qPCR
Rpl13a	TGACCAATAGGAAGAGCAACC	AGATGCCCCACTCACAAGAT	RT-qPCR	Housekeeping
Tbp	GAACATCATGGATCAGAACAACA	ATAGGGATTCCGGGAGTCAT	RT-qPCR	Housekeeping

## Sheet: ChIP-qPCR primers
Amplicon	Label (Figure 6B)	Forward primer	Reverse primer	Application	Notes
Cacna2d2-LTR5HS	(b)	TGGGACTCCAGGAAAGAATGC	TCCTTCCCTTTCCACAAGGC	ChIP-qPCR
Cacna2d2-promoter	(a)	GAGCGCAGGGAAGGAGTAG	GCCTCTGCCTACAGCTTCC	ChIP-qPCR
Epha7-LTR5HS	(c)	AAGAAGAAGAAAGGAGAGTGTGG	TGGATGAACCAGTGCATCAC	ChIP-qPCR
Epha7-promoter	(d)	TCCCATCACCTTACCTTCCTTC	AAACCTGCTCATGCACCATG	ChIP-qPCR
Alppl2-LTR5HS	(f)	ACTGGTGCCACTCATATCCTTG	ATGGGAATAAGCAGGCCAGAG	ChIP-qPCR
Alppl2-promoter	(e)	GCATCATCCCAGGTAATGAGG	GAGAGCAAAGATCAGGTCAGC	ChIP-qPCR

## Sheet: CARGO CRISPR gRNAs
Name	gRNA sequence	Application	Notes
LTR5HS-1	TACTAAGGGAACTCAG	CARGO assembly
LTR5HS-2	AAAACCGCCTTAGGGC	CARGO assembly
LTR5HS-3	AAAACTGCCTTAGGGC	CARGO assembly
LTR5HS-4	AGCCCGACACCCGTAA	CARGO assembly
LTR5HS-5	AGGAGAAAACCACCTT	CARGO assembly
LTR5HS-6	TACCATCTCGGAGAGG	CARGO assembly
LTR5HS-7	AACCTTGGACAATACC	CARGO assembly
LTR5HS-8	TAAAGGGTCTGTGCTG	CARGO assembly
LTR5HS-9	GACATTCCATTGCCCA	CARGO assembly
LTR5HS-10	ATAGAGAAAGAAAAGT	CARGO assembly
LTR5HS-11	GAAACGCCCACAGGTG	CARGO assembly
LTR5HS-12	AAGCTTTCTTGCTTAG	CARGO assembly
Nontarget-1	CGGAGTAACAAGCGGACGGA	CARGO assembly	from Shalem et al., Science 2014
Nontarget-2	CGAGTGTTATACGCACCGTT	CARGO assembly	from Shalem et al., Science 2014
Nontarget-3	CAACGGGTTCTCCCGGCTAC	CARGO assembly	from Shalem et al., Science 2014
Nontarget-4	CAGGAGTCGCCGATACGCGT	CARGO assembly	from Shalem et al., Science 2014
Nontarget-5	TTCACGTCGTCTCGCGACCA	CARGO assembly	from Shalem et al., Science 2014
Nontarget-6	GTGTCGGATTCCGCCGCTTA	CARGO assembly	from Shalem et al., Science 2014
Nontarget-7	CACGAACTCACACCGCGCGA	CARGO assembly	from Shalem et al., Science 2014
Nontarget-8	CGCTAGTACGCTCCTCTATA	CARGO assembly	from Shalem et al., Science 2014
Nontarget-9	TCGCGCTTGGGTTATACGCT	CARGO assembly	from Shalem et al., Science 2014
Nontarget-10	CTATCTCGAGTGGTAATGCG	CARGO assembly	from Shalem et al., Science 2014
Nontarget-11	AATCGACTCGAACTTCGTGT	CARGO assembly	from Shalem et al., Science 2014
Nontarget-12	CCCGATGGACTATACCGAAC	CARGO assembly	from Shalem et al., Science 2014

## Sheet: LTR5HS deletion CRISPR gRNAs
Name	gRNA sequence	Forward primer	Reverse primer	Application	Notes
Cacna2d2-gRNA-left	AGGATTGTGAGGGTTCAGGT	CACCGAGGATTGTGAGGGTTCAGGT	AAACACCTGAACCCTCACAATCCTC	px458-GFP
Cacna2d2-gRNA-right	GGAAAGGCTCTCTGGCATCT	CACCGGAAAGGCTCTCTGGCATCT	AAACAGATGCCAGAGAGCCTTTCC	px458-mCherry
Epha7-gRNA-left	CTCTTTCTGGTGTTCTCACG	CACCGCTCTTTCTGGTGTTCTCACG	AAACCGTGAGAACACCAGAAAGAGC	px458-GFP
Epha7-gRNA-right	AGCTGCCATACAAAGTATCA	CACCGAGCTGCCATACAAAGTATCA	AAACTGATACTTTGTATGGCAGCTC	px458-mCherry
Alppl2-gRNA-left	TCAATGCAGTGTTAGATTCC	CACCGTCAATGCAGTGTTAGATTCC	AAACGGAATCTAACACTGCATTGAC	px458-GFP
Alppl2-gRNA-right	GGAGGGAGTCTGAGTATTCG	CACCGGAGGGAGTCTGAGTATTCG	AAACCGAATACTCAGACTCCCTCC	px458-mCherry
Nfkb2-gRNA-left	GAAAGGATAGATGTGATCAG	CACCGAAAGGATAGATGTGATCAG	AAACCTGATCACATCTATCCTTTC	px458-GFP
Nfkb2-gRNA-right	TGTTGTCTACTACGTTTCTC	CACCGTGTTGTCTACTACGTTTCTC	AAACGAGAAACGTAGTAGACAACAC	px458-mCherry
Serpinb9-gRNA-left	ACATCATCCTGCATGCTACC	CACCGACATCATCCTGCATGCTACC	AAACGGTAGCATGCAGGATGATGTC	px458-GFP
Serpinb9-gRNA-right	AGGCTCAAACAAATTCTACC	CACCGAGGCTCAAACAAATTCTACC	AAACGGTAGAATTTGTTTGAGCCTC	px458-mCherry
Gdpd1-gRNA-left	AGGTTGAGCAAAGCTATCAA	CACCGAGGTTGAGCAAAGCTATCAA	AAACTTGATAGCTTTGCTCAACCTC	px458-GFP
Gdpd1-gRNA-right	AGATGTAATTCATACAGGCC	CACCGAGATGTAATTCATACAGGCC	AAACGGCCTGTATGAATTACATCTC	px458-mCherry
